# Supplementary material for: B cell-intrinsic epigenetic modulation of antibody responses by dietary fiber-derived short-chain fatty acids
Source: PubMed Central journal article supplement (PMC6940392; doi:10.1038/s41467-019-13603-6), 2020-01-02
Supplement: 41467_2019_13603_MOESM1_ESM.pdf [file 41467_2019_13603_MOESM1_ESM.pdf]

## Supplementary Information

### **B cell-intrinsic epigenetic modulation of the antibody response by dietary fiber-derived short-chain fatty acids**

Helia N. Sanchez, Justin B. Moroney, Huoqun Gan, Tian Shen, John L. Im, Tianbao Li, Julia R. Taylor, Hong Zan and Paolo Casali

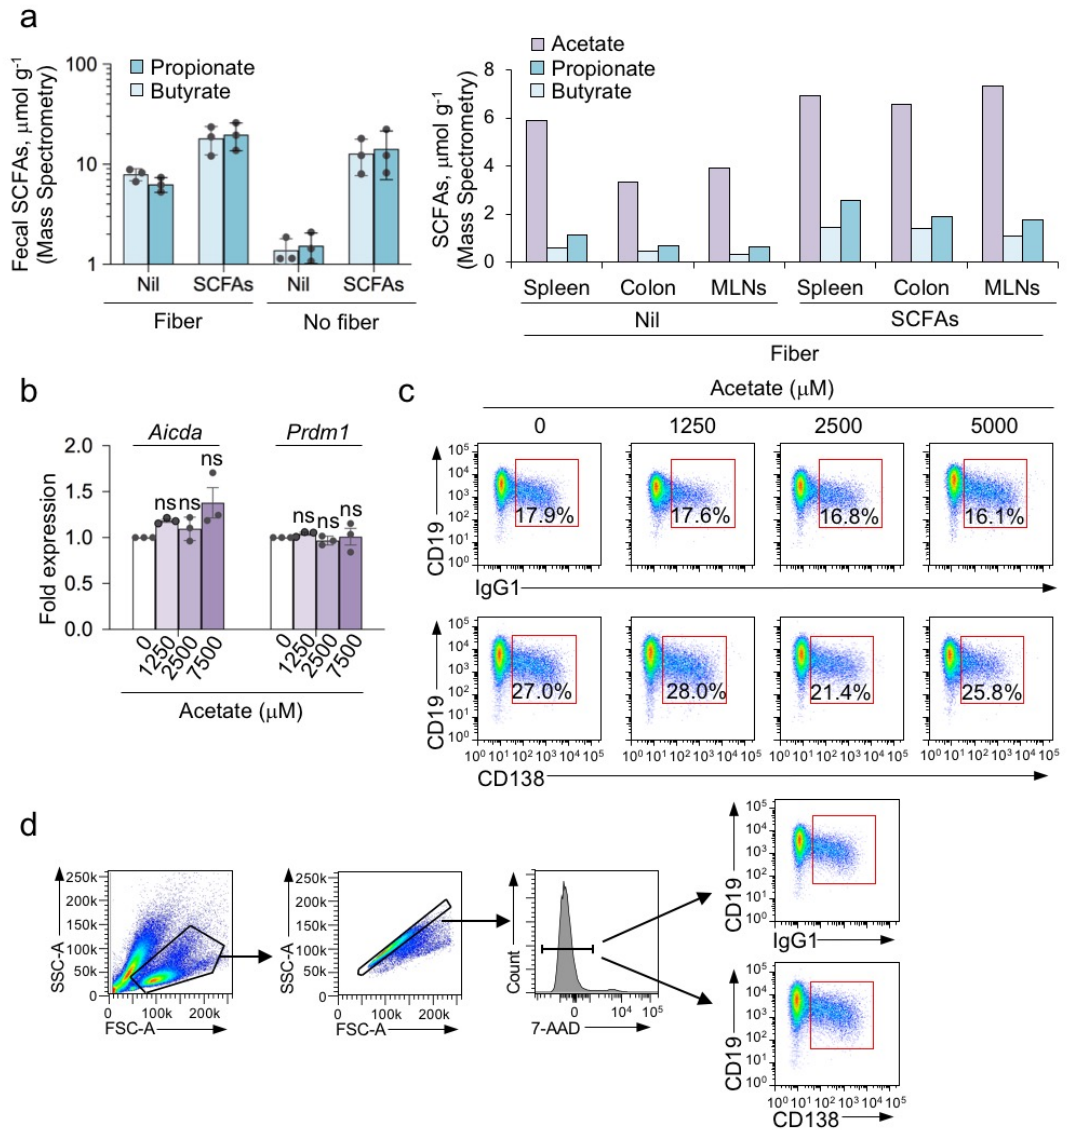

**Supplementary Figure 1. Administration of dietary fiber and/or exogenous SCFAs alter gut butyrate and propionate concentrations. Acetate does not alter *Aicda* and *Prdm1* expression, CSR or plasma cell differentiation.** **a**, C57BL/6 mice, after weaning, were fed a fiber or no-fiber diet, and given SCFA-water (SCFAs) or plain water (Nil) starting at the age of 5 weeks. Concentrations of butyrate and propionate in the feces, as well as acetate, butyrate and propionate in the spleen, colon and mesenteric lymph nodes were measured by mass spectrometry 21 days later. Fecal and spleen SCFA data are means and SE from 3 mice in each group. Colon SCFA data are means and SE from two mice in each group. MLN SCFA data are from pooled samples of five mice of each group. **b,c**, Mouse B cells were stimulated with LPS plus IL-4, in the presence of increased concentration of acetate (0, 1250, 2500 or 5000  $\mu\text{M}$ ). The expression of *Aicda* and *Prdm1* transcripts was analyzed 72 h post stimulation by qRT-PCR and normalized to *Gapdh* transcripts. Data are from three independent experiments (mean and SE) (**b**). The proportions of IgG1<sup>+</sup> B cells and CD138<sup>+</sup> plasmablasts/plasma cells were analyzed 96 h post stimulation by flow cytometry. Data are one representative of three independent experiments yielding comparable results (**c**). **d**, Gating strategy to analyze class-switched B cells and plasma cells in *in vitro* stimulated cells presented on (**c**). The same strategy was used for similar analysis presented on Fig. 7b,d-f, 5a-d,f and Supplementary Fig. 6a,b, 9a, 10c,d and 11b. The source data are provided in a Source Data file.

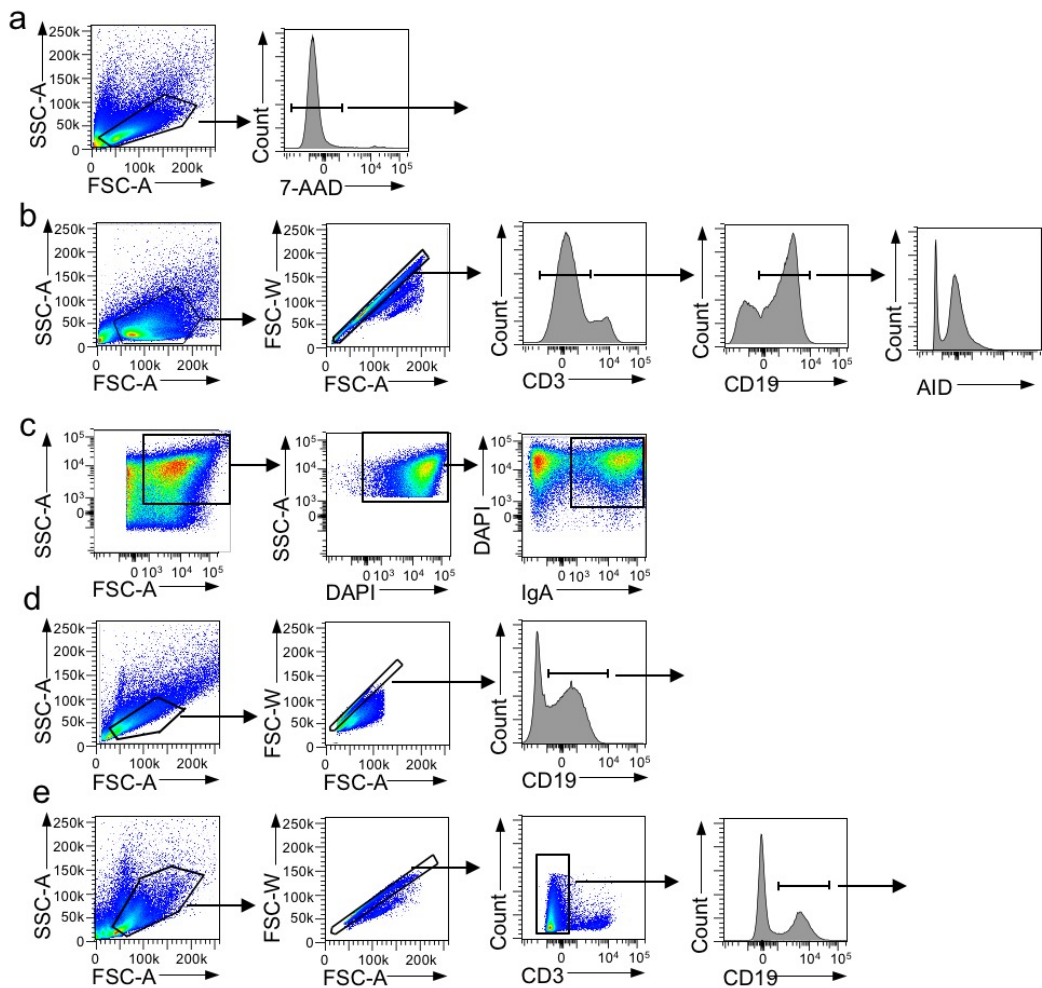

**Supplementary Figure 2. Gating strategy for flow cytometry analysis.** **a**, Gating strategy to analyze *ex vivo* class switched B cells, germinal center B cells and plasma cells presented in Fig. 1e. The same strategy was used for similar analysis presented in Fig. 4h. **b**, Gating strategy to analyze intracellular AID expression presented in Fig. 2b. The same strategy was used for similar analysis presented on Fig. 4b, 10d and Supplementary Fig. 13c. **c**, Gating strategy to analyze fecal bacteria-bound antibodies presented in Fig. 2d,e. **d**, Gating strategy to analyze intracellular AID and Blimp1 expression presented in Fig. 3h. **e**, Gating strategy to analyze *ex vivo* class-switched B cells and plasma cells presented in Fig. 4c.

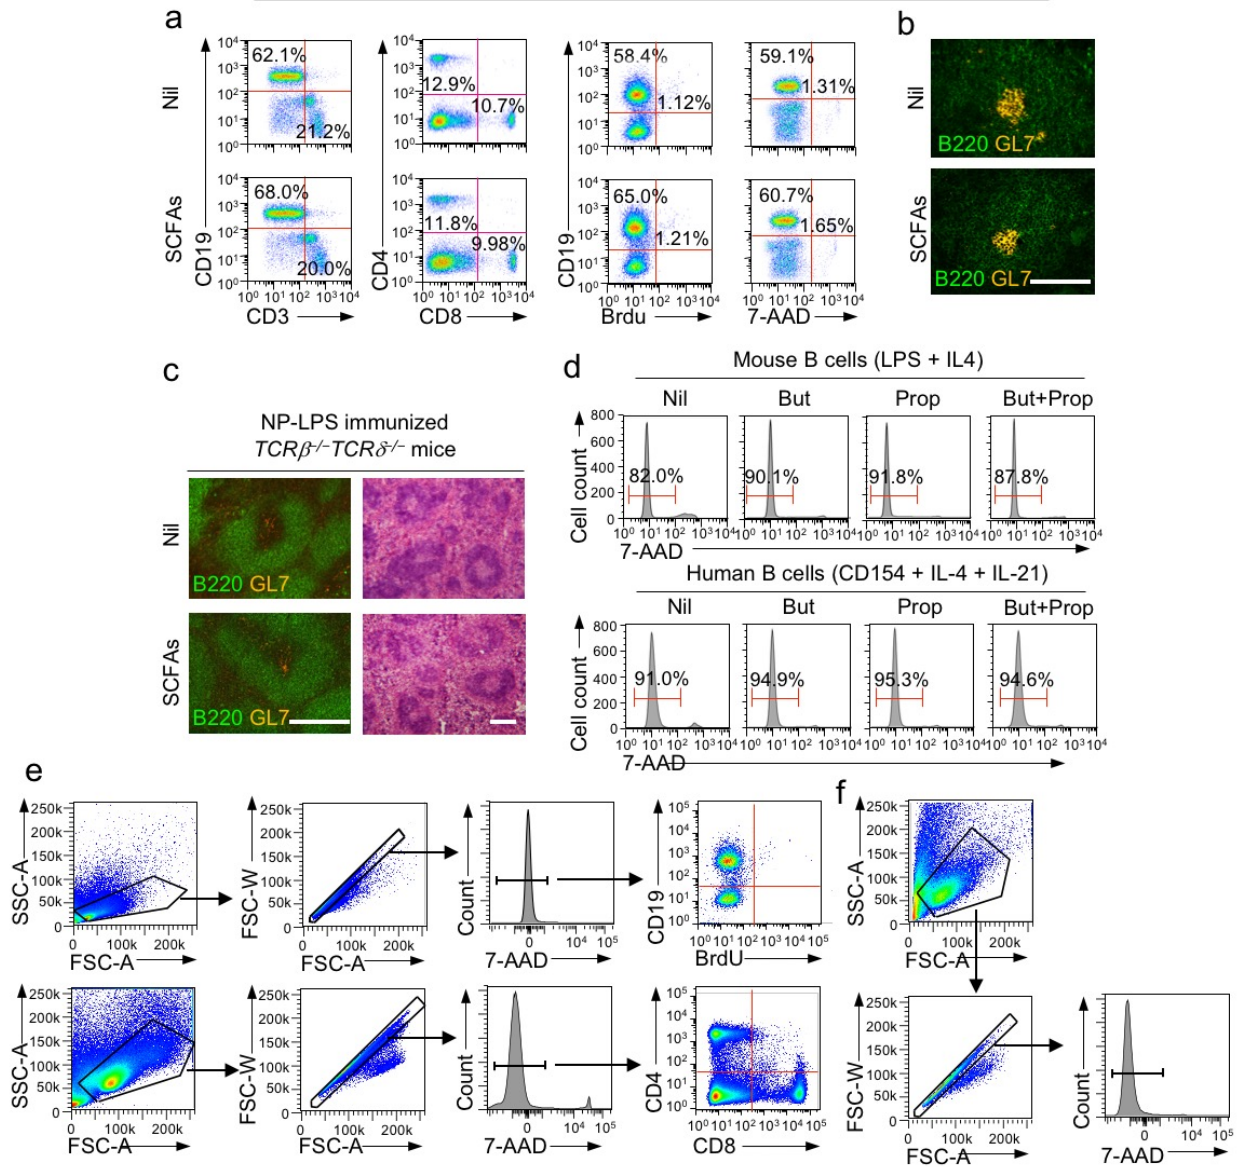

**Supplementary Figure 3. SCFAs do not alter B and T cell numbers, B cell proliferation and viability or GC formation.** **a,b**, C57BL/6 mice fed fiber diet were given SCFA-water (SCFAs) or plain water (Nil) starting at the age of 5 weeks and injected with NP<sub>16</sub>-CGG (in alum) at the age of 8 weeks. The mice were sacrificed 10 days post-injection. Proportions of CD19<sup>+</sup> B cells, CD3<sup>+</sup> T cells, CD4<sup>+</sup> and CD8<sup>+</sup> T cells, proliferating B cells (BrdU-stained CD19<sup>+</sup> B cells) and viable (7-AAD<sup>-</sup>) CD19<sup>+</sup> B cells in the spleen were analyzed by flow cytometry (**a**). GCs were visualized by fluorescent microscopy (B220, green; GL-7, orange) (**b**). **c**, *Tcrβ<sup>-/-</sup>Tcrδ<sup>-/-</sup>* mice fed fiber diet were given SCFA-water or plain water starting at the age of 5 weeks and injected NP-LPS (in PBS) at the age of 8 weeks. GCs were visualized by fluorescent microscopy (B220, green; GL-7, orange) and H&E staining 10 days post-injection. **d**, Mouse and human B cells were stimulated with LPS plus IL-4 or CD154 plus IL-4 and IL-21, respectively, for 96 h, in the presence of nil, butyrate (500 μM), propionate (2000 μM) or butyrate (500 μM) plus propionate (2000 μM), and analyzed for viable (7-AAD<sup>-</sup>) CD19<sup>+</sup> B cells by flow cytometry. Data are one representative of three independent experiments yielding comparable results. **a**, Gating strategy to analyze *ex vivo* B cell proliferation and T cells presented on Supplementary Fig. 3a. **e**, Gating strategy for (**a**). **f**, Gating strategy for (**d**). Scale bar = 100 μm.

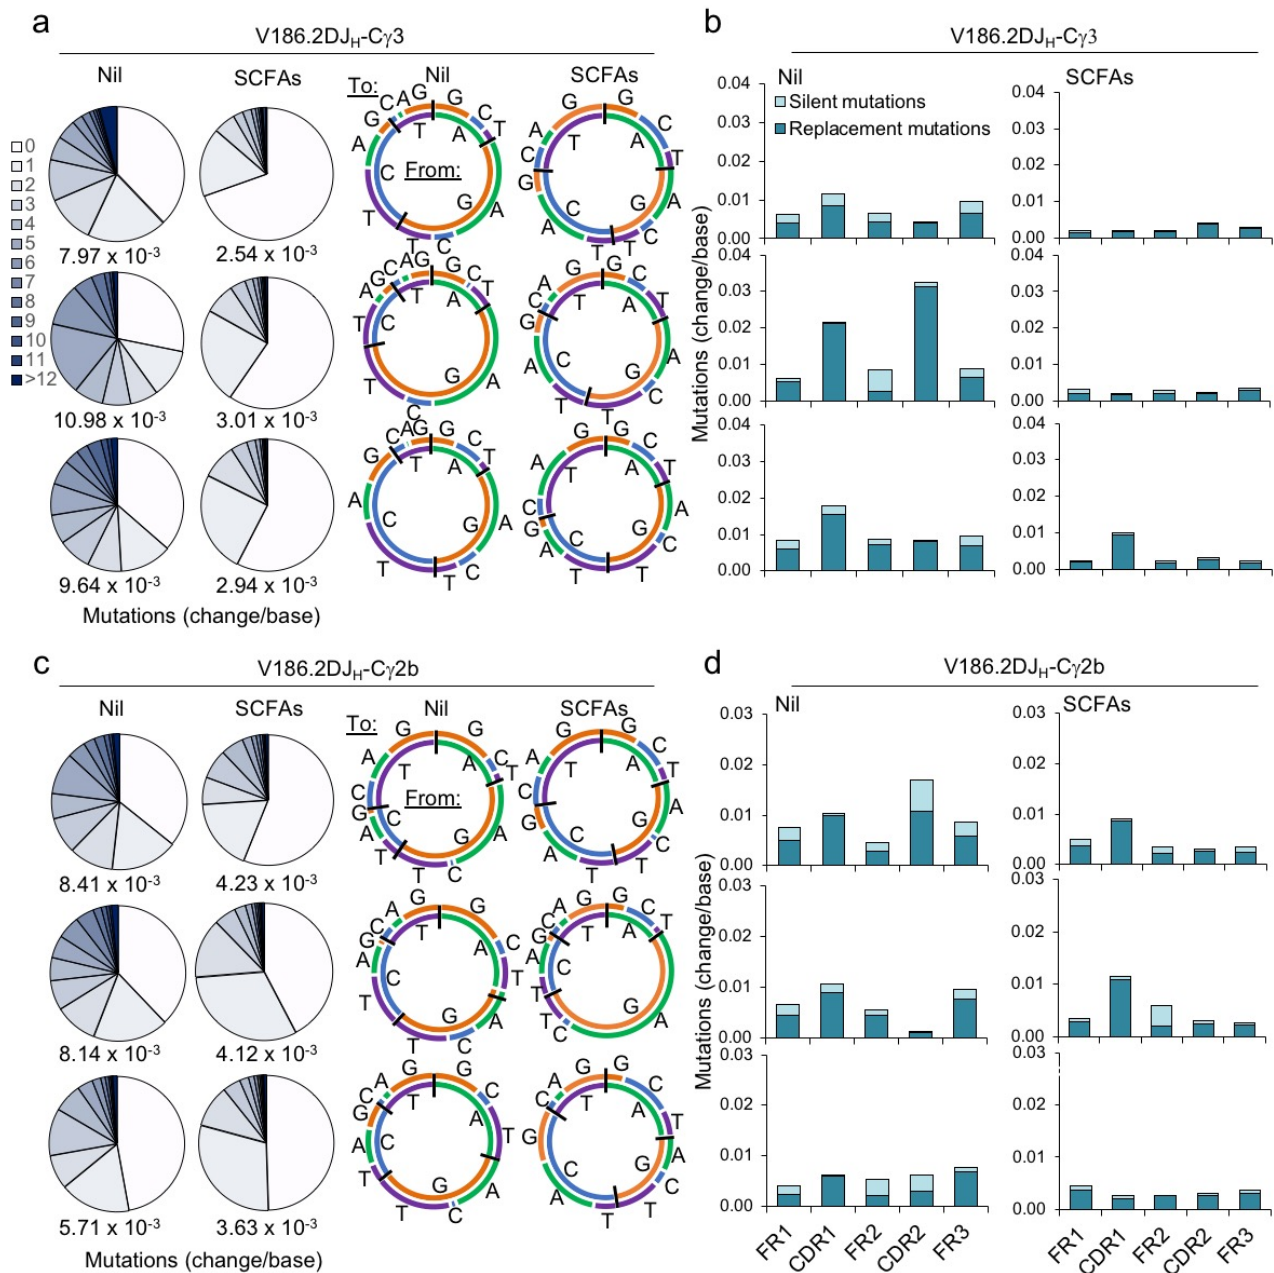

**Supplementary Figure 4. SCFAs dampen SHM in the T-independent antibody response to NP-LPS in *Tcrβ*<sup>-/-</sup>*Tcrδ*<sup>-/-</sup> mice.** *Tcrβ*<sup>-/-</sup>*Tcrδ*<sup>-/-</sup> mice fed fiber diet were given SCFA-water (SCFAs) or plain water (Nil) starting at the age of 5 weeks and injected with NP-LPS (in PBS) at the age of 8 weeks. The mice were boost-injected 21 days later with NP-LPS (in PBS). Somatic point-mutations were analyzed in the V<sub>186.2</sub> region of V<sub>186.2</sub>DJ<sub>H</sub>-C<sub>γ</sub>3 (**a,b**) and V<sub>186.2</sub>DJ<sub>H</sub>-C<sub>γ</sub>2b (**c,d**) transcripts amplified from spleen B cells 7 days after the boost injection. Pie charts depict the proportions of sequences carrying different numbers of point-mutations over the 294 bp V<sub>186.2</sub> segment. Listed below the pie charts is the overall mutation frequency (change/base). Donut charts depict the spectrum of point-mutations (**a,c**). Histograms depict frequencies of silent and replacement mutations in FR and CDR regions (**b,d**). Data are from three pairs of fiber fed mice given SCFA-water and plain-water. The source data are provided in a Source Data file.

V186.2DJ<sub>H</sub>-C $\gamma$ 3 (NP-LPS immunized *TCR $\beta$ <sup>-/-</sup>*-*TCR $\delta$ <sup>-/-</sup>* mice)

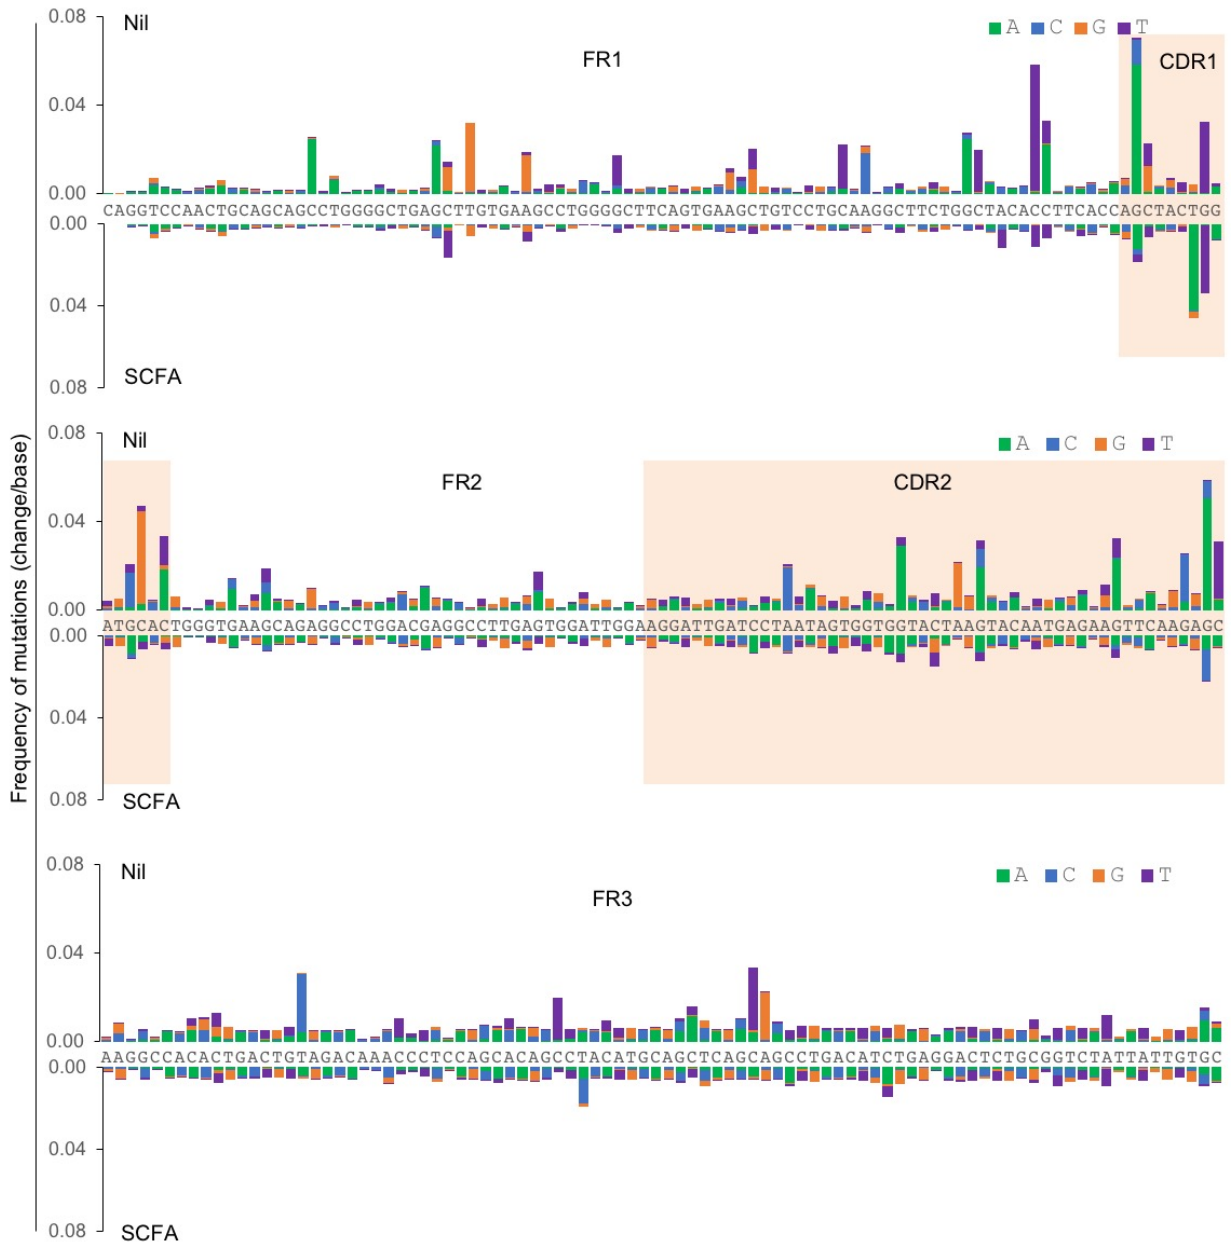

**Supplementary Figure 5. Spectrum and distribution of point-mutations in the V<sub>186.2</sub> region of V<sub>186.2</sub>DJ<sub>H</sub>-C $\gamma$ 3 transcripts in the NP-LPS immunized *Tcr $\beta$ <sup>-/-</sup>*-*Tcr $\delta$ <sup>-/-</sup>* mice treated with nil or SCFAs.** *Tcr $\beta$ <sup>-/-</sup>*-*Tcr $\delta$ <sup>-/-</sup>* mice fed fiber diet were given SCFA-water (SCFAs) or plain water (Nil) starting at the age of 5 weeks and injected with NP-LPS (in PBS) at the age of 8 weeks. The mice were boost-injected 21 days later with NP-LPS (in PBS). The V<sub>186.2</sub> region of V<sub>186.2</sub>DJ<sub>H</sub>-C $\gamma$ 3 transcripts were amplified from spleen B cells 7 days after the NP-LPS boost injection and analyzed for spectrum and distribution of point-mutations. Data are pooled from three pairs of fiber-fed mice given SCFA-water or plain water (as in **Supplementary Figure 5**). . The source data are provided in a Source Data file.

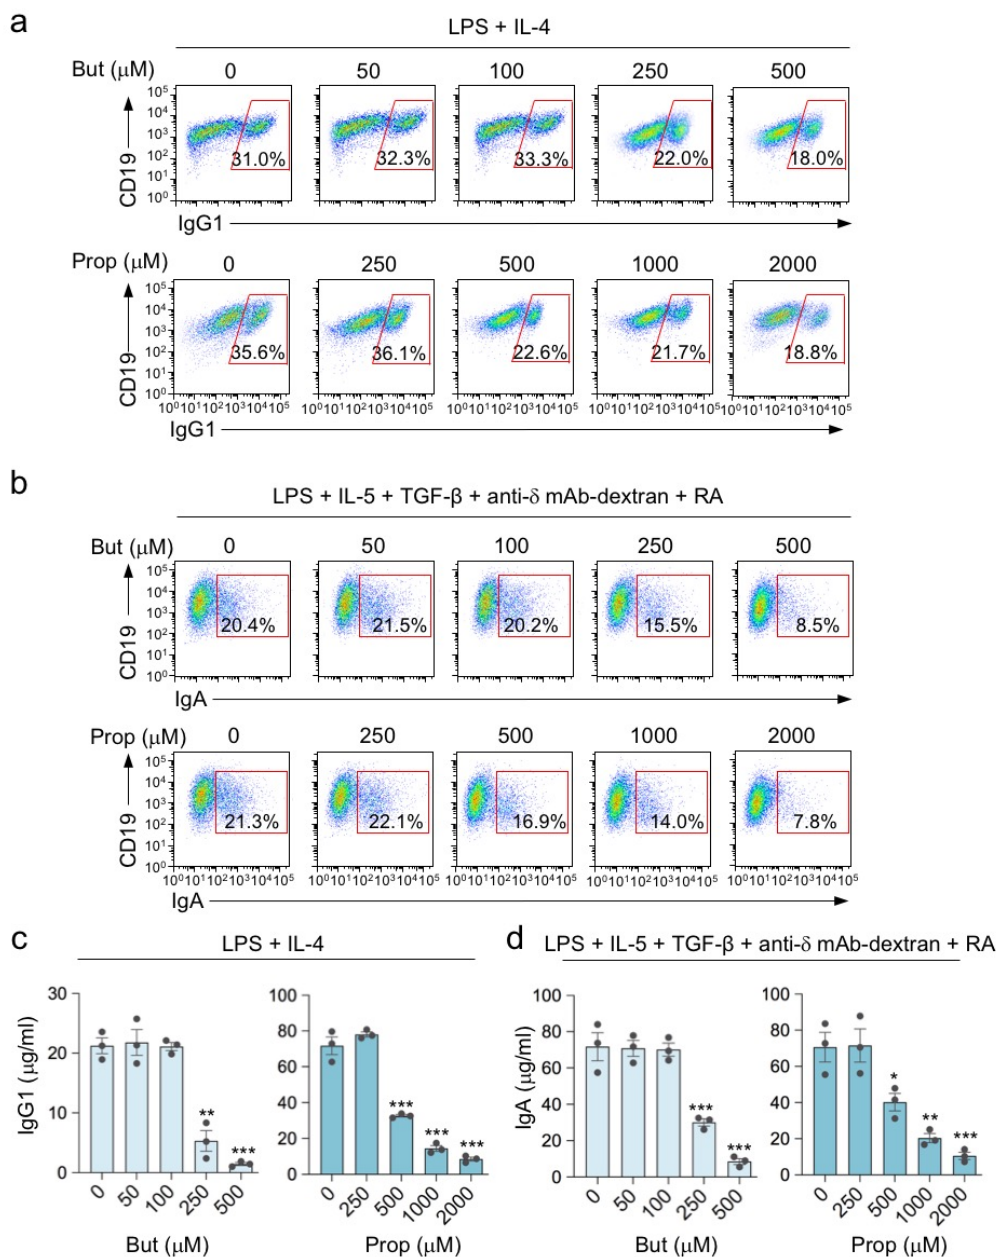

**Supplementary Figure 6. Butyrate and propionate inhibit CSR in a dose-dependent fashion.** Mouse B cells were stimulated for 96 h with LPS plus IL-4, LPS plus IL-5, TGF- $\beta$ , anti- $\delta$  mAb-dextran and RA, in the presence of nil, butyrate (50, 100, 250 or 500  $\mu$ M) or propionate (250, 500, 1000 or 2000  $\mu$ M). **a,b**, The proportions of IgG1<sup>+</sup> and IgA<sup>+</sup> B cells were analyzed by flow cytometry. Data are one representative of three independent experiments yielding comparable results. **c,d**, IgG1 and IgA titers in culture fluids as analyzed by specific ELISAs. Data are from three independent experiments (mean and SE). \* $p$  < 0.05, \*\* $p$  < 0.01, \*\*\* $p$  < 0.001 (unpaired  $t$ -test). The source data are provided in a Source Data file.

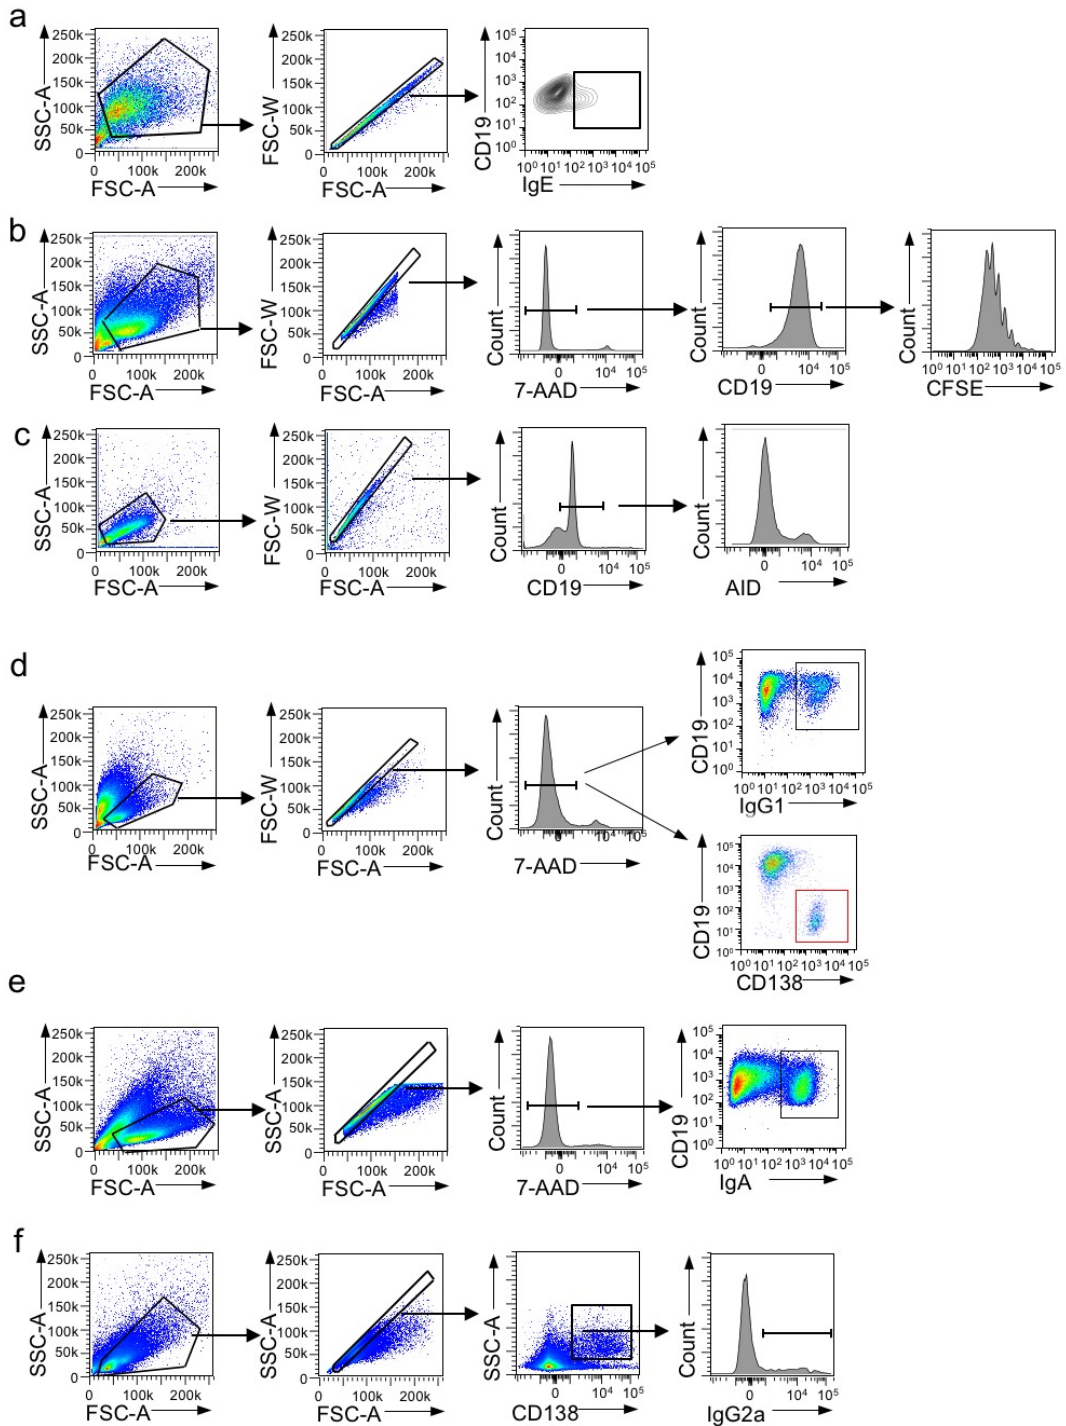

**Supplementary Figure 7. Gating strategy for flow cytometry analysis.** **a**, Gating strategy to analyze intracellular intracellular CD19<sup>+</sup> IgE<sup>+</sup> B cells presented on Fig. 5e. **b**, Gating strategy to analyze CFSE signal in B cells presented on Fig. 5g. **c**, Gating strategy to analyze intracellular AID expression in *in vitro* stimulated B cells presented on Fig. 5k. **d**, Gating strategy to analyze class-switched human B cells and plasma cells presented on Fig. 6a,b. **e**, Gating strategy to analyze IgA<sup>+</sup> CH12 B cells presented on Fig. 9f. **f**, Gating strategy to analyze class-switched plasmablasts presented on Supplementary Fig. 13e.



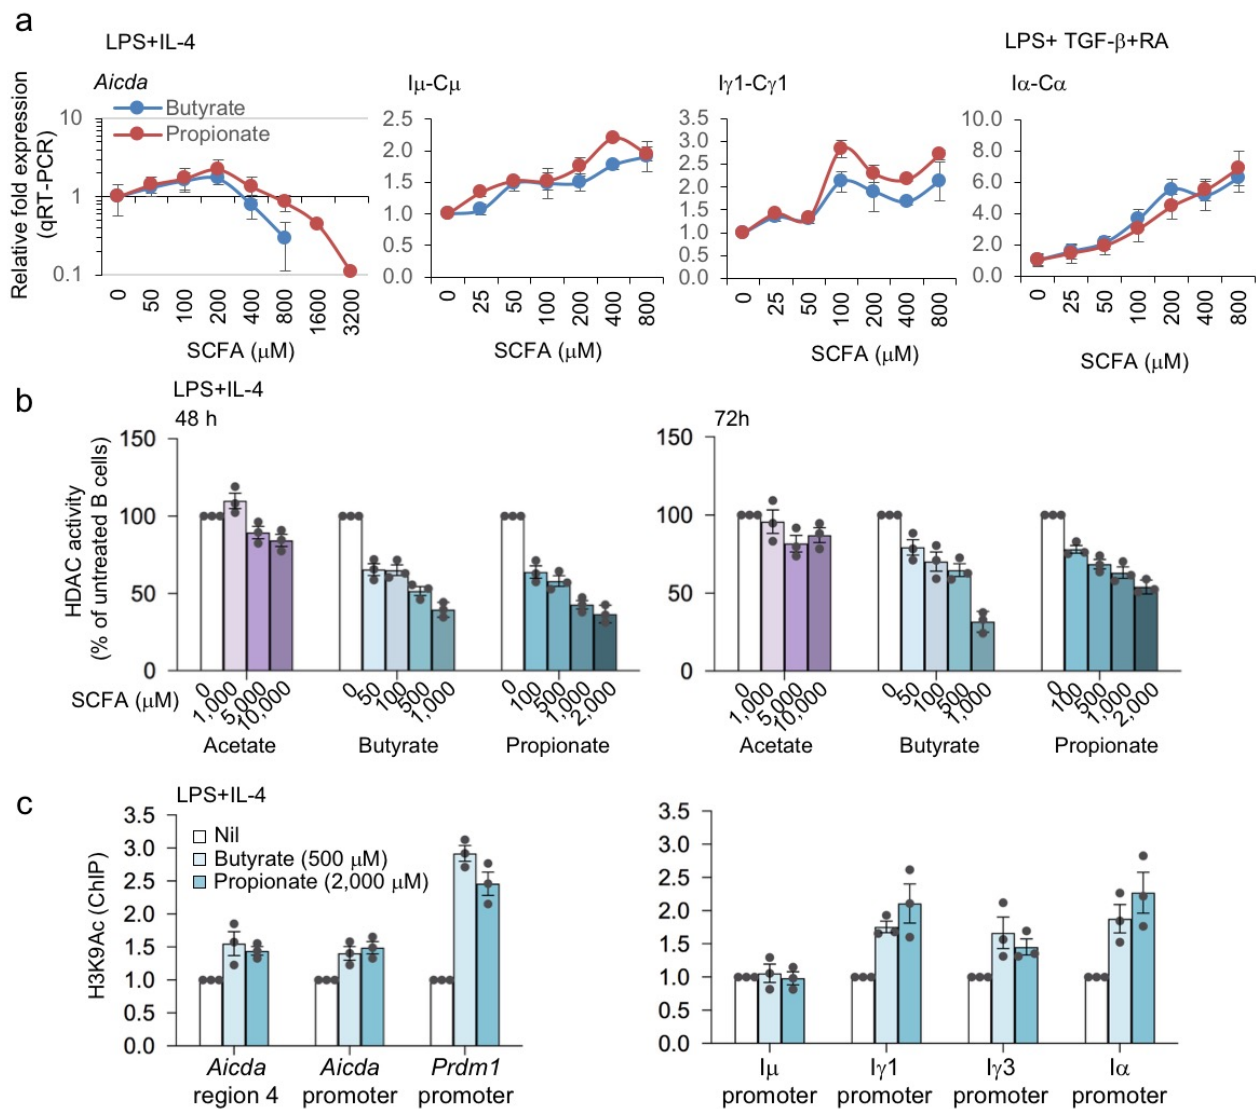

**Supplementary Figure 8. Dose-dependent effect of SCFAs in the modulation of *Aicda* and germline I<sub>H</sub>-C<sub>H</sub> expression and HDAC activity in B cells.** **a**, B cells were stimulated with LPS plus IL-4, or LPS plus TGF- $\beta$  and RA in the presence of increased dose of butyrate or propionate for 60 h. Expression of *Aicda* and germline I $\mu$ -C $\mu$ , I $\gamma$ 1-C $\gamma$ 1 and I $\alpha$ -C $\alpha$  transcripts, as analyzed by qRT-PCR and normalized to  $\beta$ -Actin transcripts. Data are from 3 independent experiments (mean and SE). **b**, HDAC activity in B cells stimulated with LPS plus IL-4 in the presence of increased dose of acetate, butyrate or propionate for 48 or 72 h. **c**, Acetylated histone H3 (H3K9ac) in the *Aicda* regulatory region 4, *Aicda* promoter, *Prdm1* promoter, I $\mu$ , I $\gamma$ 1, I $\gamma$ 3 and I $\alpha$  promoters in B cells stimulated for 60 h with LPS plus IL-4 (*Aicda* regulatory region 4, *Aicda* promoter, *Prdm1* promoter, I $\mu$  promoter and I $\gamma$ 1 promoter), LPS only (I $\gamma$ 3 promoter) or LPS, plus TGF- $\beta$  and RA (I $\alpha$  promoter), as analyzed by ChIP and qPCR. The source data are provided in a Source Data file.

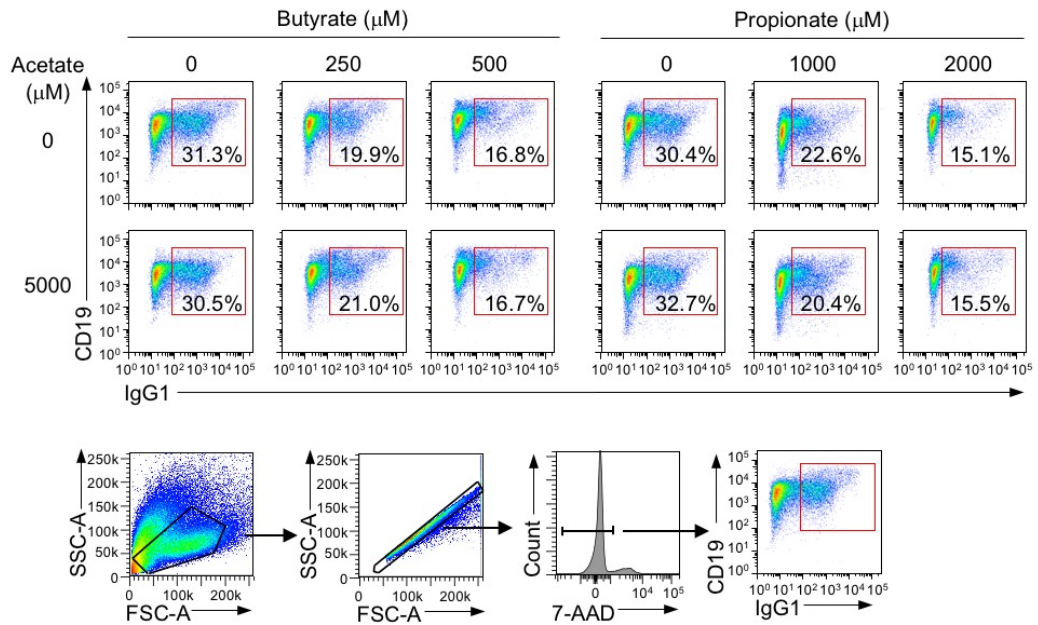

**Supplementary Figure 9. Acetate does not alter butyrate- and propionate-mediated inhibition of CSR and plasma cell differentiation.** Mouse B cells were stimulated with LPS plus IL-4, and cultured for 96 h with increased concentration of butyrate (0, 250 or 500  $\mu\text{M}$ ) or propionate (0, 1000 or 2000  $\mu\text{M}$ ) without or with acetate (5000  $\mu\text{M}$ ). The proportions of IgG1<sup>+</sup> B cells were analyzed by flow cytometry. Bottom panels show the gating strategy. Data are one representative of three independent experiments yielding comparable results.

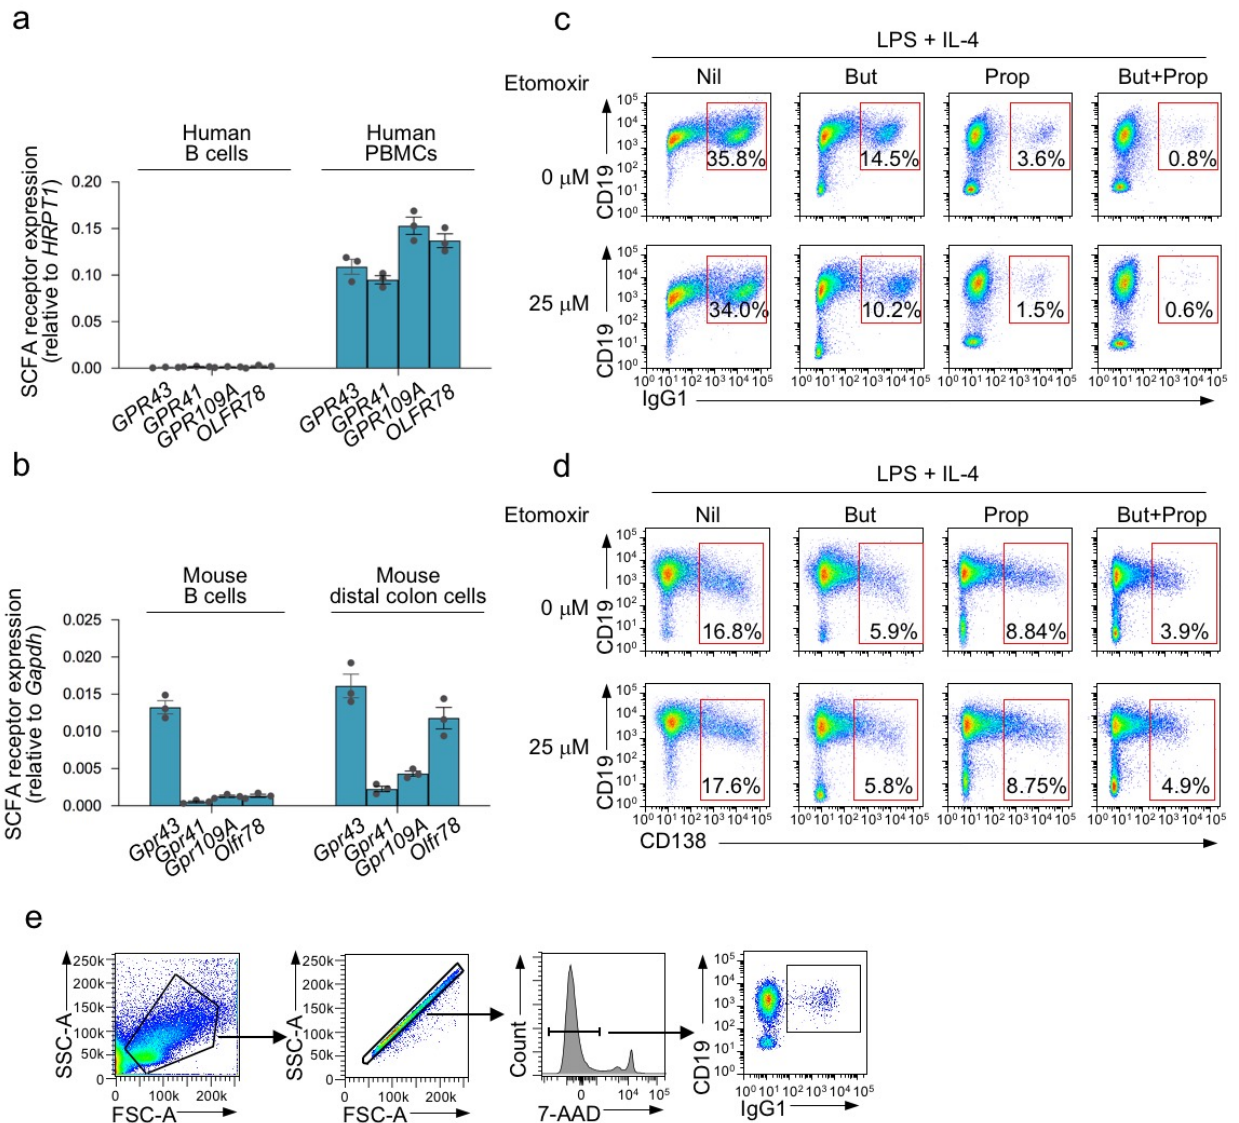

**Supplementary Figure 10. Lack of expression of SCFA receptors in human and mouse B cells. Blocking the function of SCFAs as an energy substance by fatty acid  $\beta$ -oxidation inhibitor etomoxir does not affect SCFA-mediated inhibition of CSR and plasma cell differentiation.** **a**, *FFAR2*, *FFAR3*, *GPR109A* and *OLFR78* transcripts in human B cells stimulated for 60 h with CD154, IL-21, and IL-4, and human PBMCs were measured by qRT-PCR and normalized to *HRPT* expression. **b**, *Ffar2*, *Ffar3*, *Gpr109A* and *Olfr78* transcripts in mouse B cells stimulated with LPS plus IL-4 for 60 h and mouse distal colon cells were measured by qRT-PCR and normalized to  $\beta$ -*Actin* expression. Data are mean and SE from three independent experiments. **c,d**, Mouse B cells were cultured with LPS plus IL-4 in the presence of nil, butyrate (500  $\mu$ M), propionate (2000  $\mu$ M) or butyrate (500  $\mu$ M) plus propionate (2000  $\mu$ M), without or with etomoxir (25  $\mu$ M). After 96 h, IgG1<sup>+</sup> B cells (**c**) and CD138<sup>+</sup> plasmablasts/plasma cells (**d**) were analyzed by flow cytometry. Data are one representative of three independent experiments yielding comparable results. **e**, Gating strategy for (**c**) and (**d**). The source data are provided in a Source Data file.

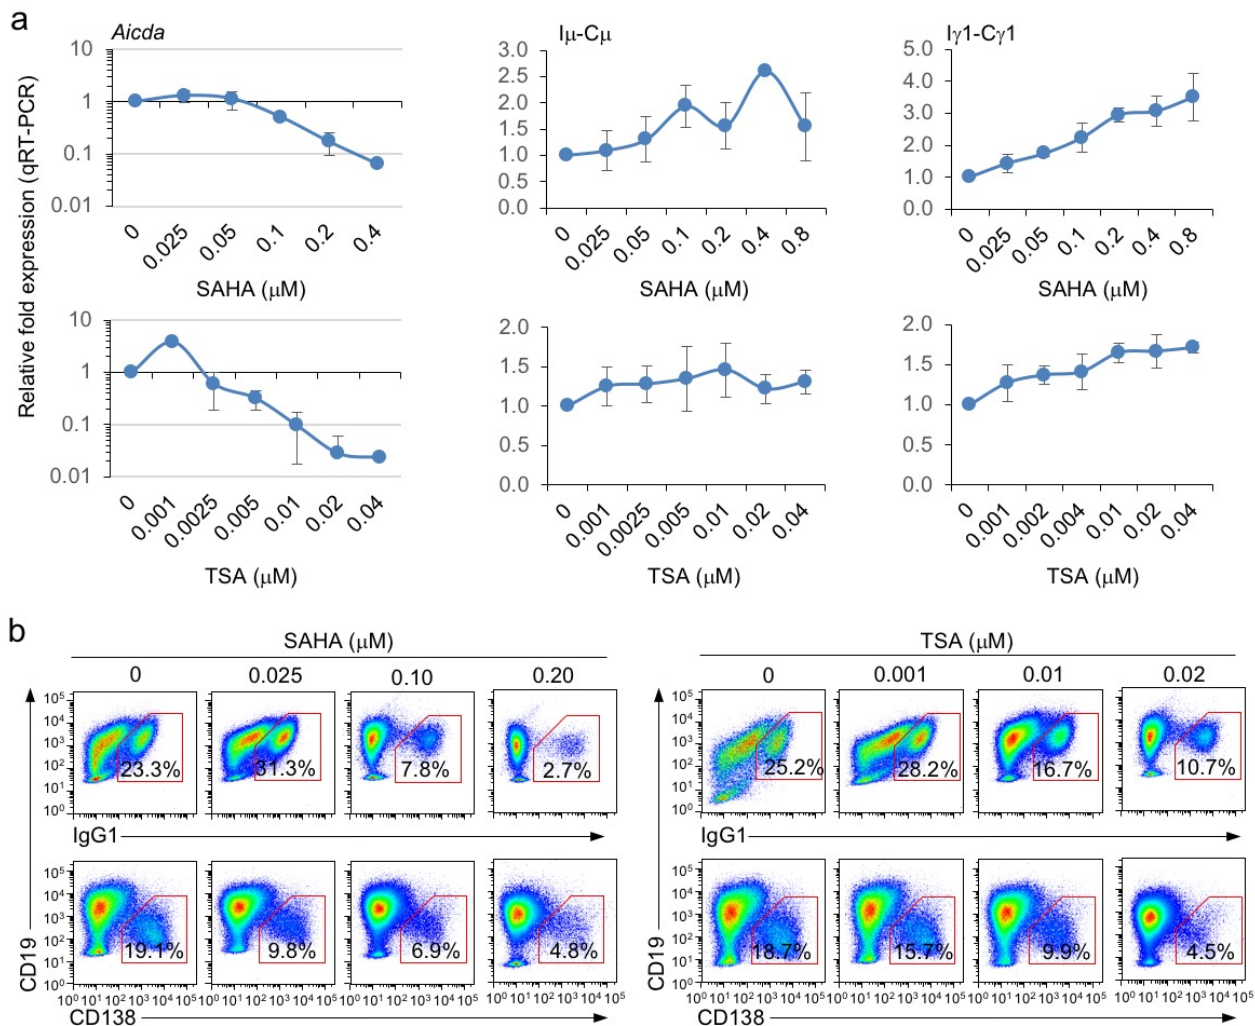

**Supplementary Figure 11. Dose-dependent effect of HDAC inhibitors SAHA and TSA in the modulation of *Aicda* and germline  $I_{H-C_H}$  expression, CSR and plasma cell differentiation.** B cells were stimulated with LPS plus IL-4 in the presence of increased dose of SAHA or TSA. **a**, Expression of *Aicda* and germline  $I_{\mu-C_{\mu}}$  and  $I_{\gamma 1-C_{\gamma 1}}$  transcripts, as analyzed 60 h post stimulation by qRT-PCR and normalized to  $\beta$ -Actin transcripts. Data are from 3 independent experiments (mean and SE). **b**, The proportions of CD19<sup>+</sup> IgG1<sup>+</sup> B cells and CD19<sup>low</sup>CD138<sup>+</sup> plasma cells were analyzed 96 h post stimulation by flow cytometry. Data are representative of 3 independent experiments yielding comparable results. The source data are provided in a Source Data file.

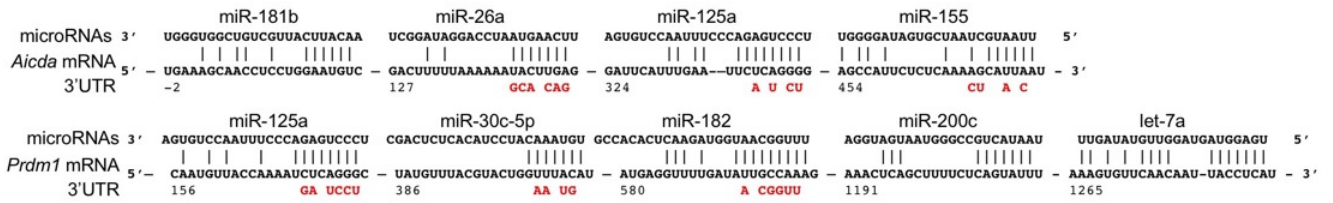

**Supplementary Figure 12. Alignment of the 3' UTRs of *Aicda* and *Prdm1* mRNAs and the targeting miRNAs.** The nucleotide changes in the mutant *Aicda* and *Prdm1* 3' UTRs used in luciferase reporter constructs depicted in red.

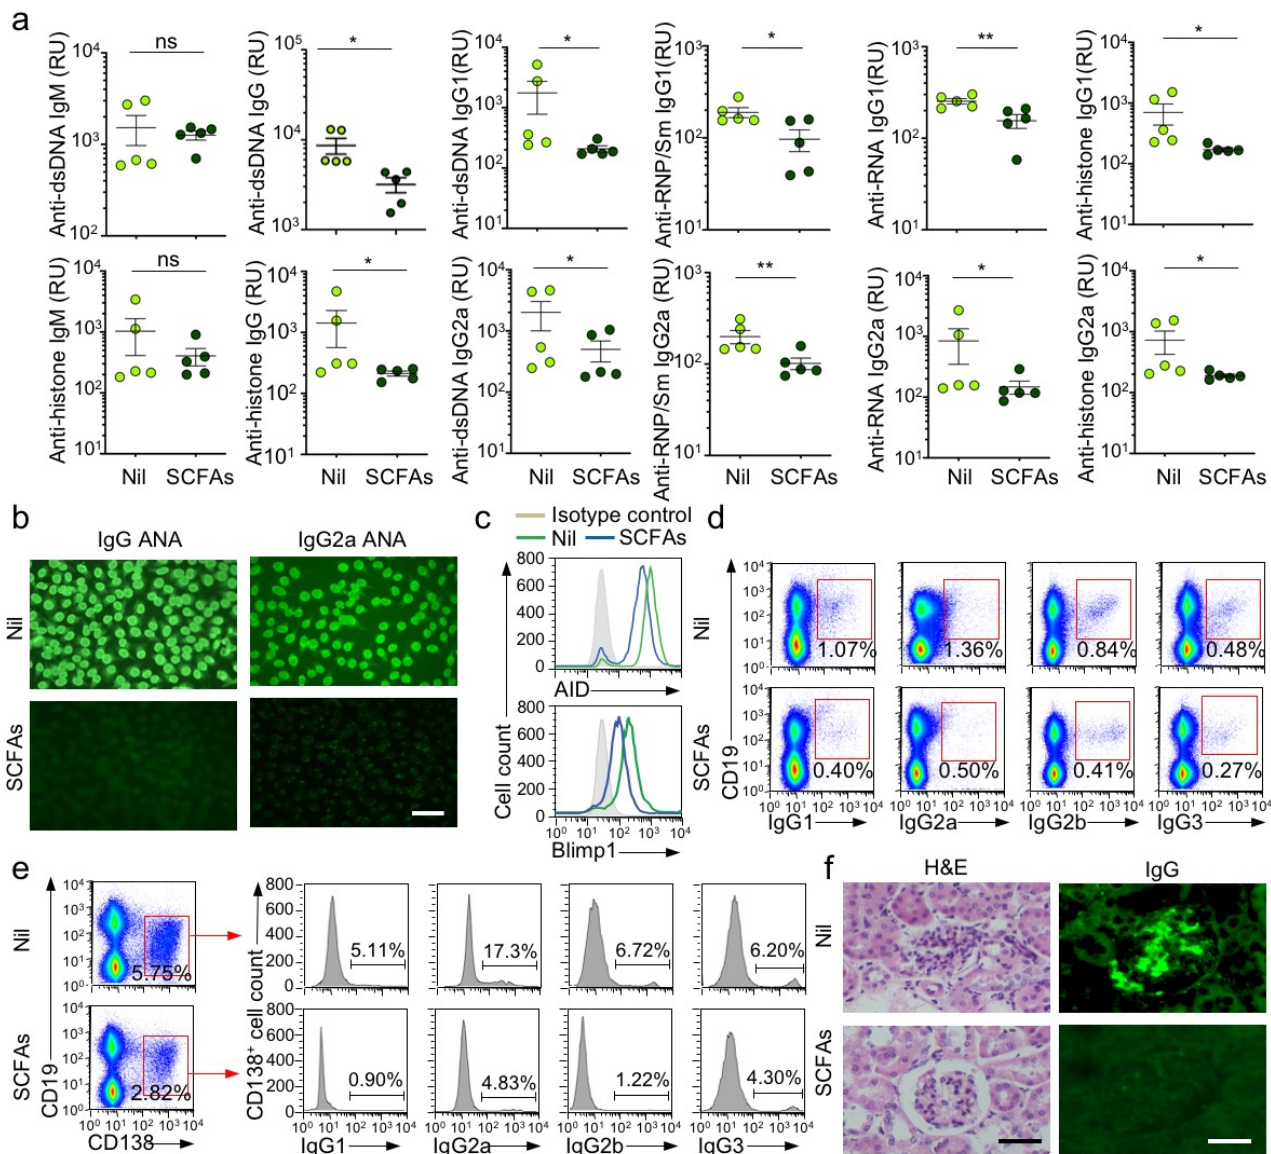

**Supplementary Figure 13. SCFAs reduce autoantibody response and autoimmunity in lupus-prone NZB/W F1 mice.** Female NZB/W F1 mice fed fiber diet were given SCFA-water (SCFAs) or plain water (Nil) starting at the age of 14 weeks and sacrificed at 26 weeks of age. **a**, Titers of circulating anti-dsDNA IgM, and anti-dsDNA, anti-RNP/Sm, anti-histone and anti-RNA IgG1 and IgG2a (relative units, RU), as analyzed by specific ELISAs. Each symbol represents an individual mouse ( $n = 5$  per group). \* $p < 0.05$ , \*\* $p < 0.01$ , ns: not significant (unpaired  $t$ -test). **b**, ANA visualized by indirect immunofluorescence on HEP-2 cells that were incubated with sera (1:400 dilution) from the NZB/WF1 mice using FITC-labeled rat mAbs to mouse IgG and IgG2a. Data are from one of 3 independent experiments yielding comparable results. **c**, AID and Blimp-1 expression as analyzed by intracellular staining followed by flow cytometry. **d**, Spleen surface IgG1, IgG2a, IgG2b and IgG3 B cells, and **e**, intracellular CD19<sup>low/neg</sup>CD138<sup>+</sup>, CD138<sup>+</sup> IgG1<sup>+</sup>, CD138<sup>+</sup> IgG2a<sup>+</sup>, CD138<sup>+</sup> IgG2b<sup>+</sup>, and CD138<sup>+</sup> IgG3<sup>+</sup> plasmablasts/plasma cells as analyzed by flow cytometry. Data are one representative of 3 independent experiments yielding comparable results. **f**, Kidney sections stained with H&E (right panels), and kidney sections stained with FITC-labeled rat mAbs to mouse IgG (right panels). Data are one representative of 3 independent experiments. Scale bar = 20  $\mu\text{m}$  (**b**) or 100  $\mu\text{m}$  (**f**). The source data are provided in a Source Data file.

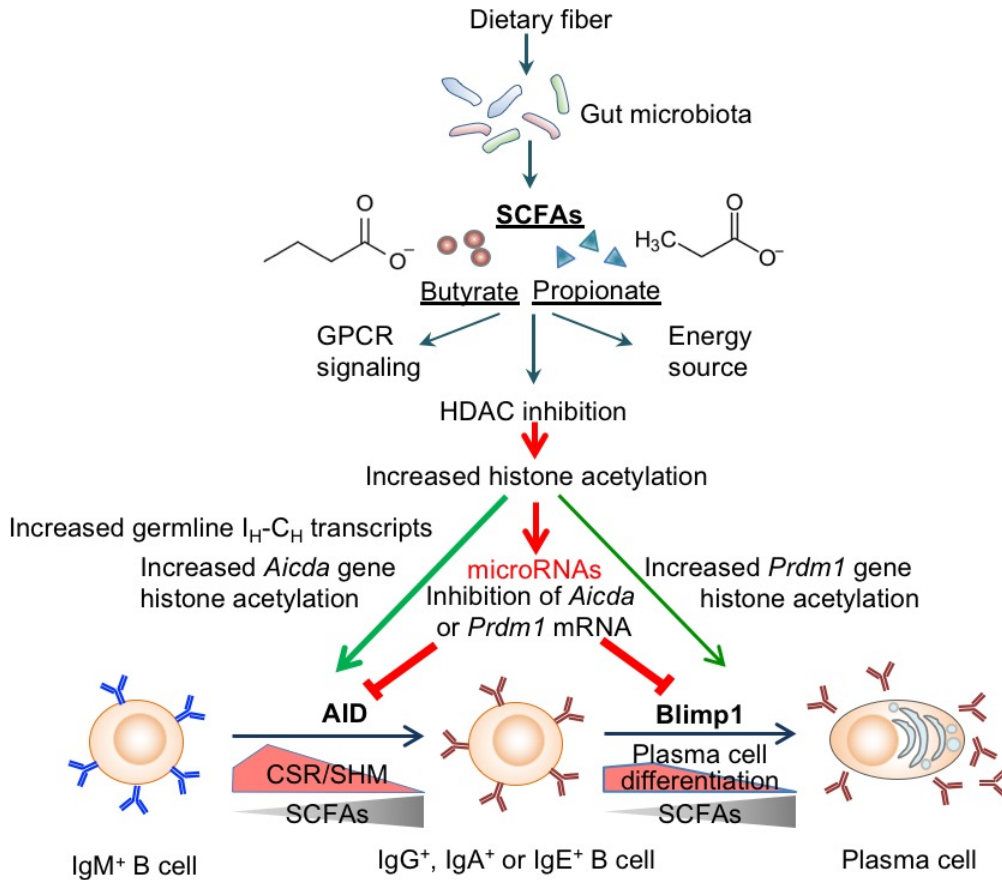

**Supplementary Figure 14. Dose-dependent modulation of *Aicda* and *Prdm1* expression, CSR, SHM and plasma cell differentiation by SCFAs.** SCFAs butyrate and propionate modulate B cell functions through HDAC inhibition activity, which leads to increased histone acetylation of many genes, including the host genes of select miRNAs targeting *Aicda* or *Prdm1*. While *Aicda*- and *Prdm1*-targeting miRNAs induced by SCFAs inhibits *Aicda* and *Prdm1* in a dose-dependent fashion over a wide physiological SCFAs range, the *Aicda*- and *Prdm1*-targeting miRNAs-mediated inhibition of *Aicda* expression by low-dose SCFAs is not robust enough to override the enhancement of CSR/SHM resulting from increased SCFAs-mediated histone acetylation and germline I<sub>H</sub>-C<sub>H</sub> transcription. As for *Prdm1*, low-dose SCFAs merely are not sufficient to significantly dampen this gene expression, and, therefore, Blimp1 expression and plasma cell differentiation.

**Supplementary Table 1. Antibodies used for this study.**

| Antibody to                                  | Type                     | Company          | Cat. No. (mAb clone) | Assays            |
|----------------------------------------------|--------------------------|------------------|----------------------|-------------------|
| Mouse B220, FITC-conjugated                  | Rat mAb                  | BioLegend        | 103206               | FCM               |
| Mouse CD19, Pacific Blue-conjugated          | Rat mAb                  | BioLegend        | 115523 (6D5)         | FCM               |
| Mouse IgM, PE-conjugated                     | Rat mAb                  | BioLegend        | 406507               | FCM, FCM, ANA, IC |
| Mouse IgG1, FITC-conjugated                  | Rat mAb                  | BD Biosciences   | 553443 (A85-1)       | FCM, IF           |
| Mouse IgG1, APC-conjugated                   | Rat mAb                  | BioLegend        | 406609               | FCM, IF           |
| Mouse IgG2a, FITC-conjugated                 | Rat mAb                  | BD Biosciences   | 553390 (R19-15)      | ANA, IC           |
| Mouse IgD, FITC-conjugated                   | Rat mAb                  | BioLegend        | 405713               | FCM, IF           |
| Mouse IgA, FITC-conjugated                   | Rat mAb                  | BD Biosciences   | 559354 (C10-3)       | FCM               |
| Mouse IgM, PE-conjugated                     | Goat mAb                 | BioLegend        | Dec-12               | FCM, IF           |
| Mouse CD138, PE-Cy7-conjugated               | Rat mAb                  | BioLegend        | 142514 (281-2)       | FCM               |
| Mouse Blimp1, APC-conjugated                 | Rat mAb                  | BioLegend        | 150007 (5 E7)        | FCM               |
| Mouse AID, FITC-conjugated                   | Rabbit pAb               | Bioss            | bs-7855R-FITC        | FCM               |
| Mouse CD4, APC-conjugated                    | Rat mAb                  | BioLegend        | 100411               | FCM               |
| Mouse CD8, PE-conjugated                     | Rabbit mAb               | BD Biosciences   | 563234               | FCM               |
| Mouse IgA, unconjugated                      | Rabbit mAb               | Thermo Fisher    | PA-1-30826           | IF                |
| Rabbit-IgG (H+L), Alexa Fluor 488-conjugated | Goat mAb                 | Cell Signaling   | 4412                 | IF                |
| Mouse IgE, FITC-conjugated                   | Rat mAb                  | eBioscience      | 50-995-0 (23G3)      | FCM               |
| GL7, PE-conjugated                           | Rat mAb                  | BioLegend        | 144607               | FCM, IF           |
| Human CD19, PE-conjugated                    | Mouse mAb                | BioLegend        | 302208               | FCM               |
| Human IgM, FITC-conjugated                   | Mouse mAb                | BioLegend        | 314506               | FCM               |
| Human IgA, FITC-conjugated                   | Goat pAb                 | Sigma Aldrich    | F5259                | FCM               |
| Human IgG, allophycocyanin                   | Mouse mAb                | BD Biosciences   | 562025               | FCM               |
| Human IgM, Biotin-conjugated                 | Goat pAb                 | Southern Biotech | 2022-08              | FCM               |
| Sm/RNP, unconjugated                         | From Calf thymus         | MyBioSource      | MBS318132            | ELISA             |
| Histone, unconjugated                        | Histone from calf thymus | Sigma Aldrich    | H9250                | ELISA, ELISA,     |
| Mouse Ig, unconjugated                       | Goat pAb                 | Southern Biotech | 1010-08              | ELISPOT           |
| Mouse IgG, unconjugated                      | Goat pAb                 | Southern Biotech | 1030-08              | ELISA, ELISPOT    |
| Mouse IgE, unconjugated                      | Goat pAb                 | Bethyl           | A90-1158             | ELISA, ELISPOT    |
| Mouse IgM, unconjugated                      | Goat pAb                 | Southern Biotech | 1020-01              | ELISA, ELISPOT    |
| Mouse IgA, unconjugated                      | Goat pAb                 | Southern Biotech | 1040-01              | ELISA, ELISPOT    |
| Mouse IgM, biotin-conjugated                 | Goat pAb                 | Southern Biotech | 1022-08              | ELISA, ELISPOT    |
| Mouse IgG1, biotin-conjugated                | Goat pAb                 | Southern Biotech | 1070-08              | ELISA, ELISPOT    |
| Mouse IgG2a, biotin-conjugated               | Goat pAb                 | Southern Biotech | 1080-08              | ELISA, ELISPOT    |
| Mouse IgG2b, biotin-conjugated               | Rat mAb                  | BioLegend        | 406704 (RMG2b-1)     | ELISA, ELISA,     |
| Mouse IgG3, biotin-conjugated                | Goat pAb                 | Southern Biotech | 1100-08              | ELISPOT           |
| Mouse IgE, biotin-conjugated                 | Goat pAb                 | Southern Biotech | 1110-08              | ELISA, ELISPOT    |
| Mouse IgA, biotin-conjugated                 | Goat pAb                 | Southern Biotech | 1040-08              | ELISA, ELISPOT    |
| Ovalbumin, biotin-conjugated                 |                          | GALAB            | 152060               | ELISA, ELISPOT    |



---

|                                           |            |               |                 |                   |
|-------------------------------------------|------------|---------------|-----------------|-------------------|
| EZ link sulfo-NHS-SS-Biotin               |            | Thermo Fisher | 21328           | ELISA,<br>ELISPOT |
| Mouse Blimp1                              | Rabbit mAb | eBioscience   | 50-166-72 (6D3) | IB                |
| Mouse AID                                 | Mouse mAb  | Invitrogen    | 39-2500 (ZA001) | IB                |
| Mouse acetyl-histone H3<br>(H3K9ac/K14ac) | Rabbit mAb | Millipore     | 17-615          | IB                |
| Mouse histone 3                           | Rat mAb    | Biologend     | 601901          | IB                |
| Mouse $\beta$ -actin                      | Mouse mAb  | Sigma         | A5441 (AC-15)   | IB                |
| Mouse B220, FITC-conjugated               | Rat mAb    | BioLegend     | 103206          | FCM               |
| Mouse CD19, Pacific Blue-<br>conjugated   | Rat mAb    | BioLegend     | 115523 (6D5)    | FCM               |
| Mouse IgM, PE-conjugated                  | Rat mAb    | BioLegend     | 406507          | FCM               |

---

Abbreviations: mAb, monoclonal antibody; pAb, polyclonal antibody; ANA, anti-nuclear antibody analysis; ELISA, enzyme-linked immunosorbent assay; ELISPOT, enzyme-linked immunosorbent spot; FCM, flow cytometry; IB, immunoblotting; IC, immunocomplex analysis.

---

**Supplementary Table 2. PCR Primers used for this study.**

|                                                                                                                  | Forward primer                  | Reverse primer                   |
|------------------------------------------------------------------------------------------------------------------|---------------------------------|----------------------------------|
| <u>Mouse genes</u>                                                                                               |                                 |                                  |
| <i>Aicda</i>                                                                                                     | 5'-AGAAAGTCACGCTGGAGACC-3'      | 5'-CTCCTCTTACCACGTAGCA-3'        |
| <i>Prdm1</i>                                                                                                     | 5'-GCTGCTGGGCTGCCTTTGGA-3'      | 5'-GGAGAGGAGGCCGTTCCCA-3'        |
| <i>Irf4</i>                                                                                                      | 5'-AAAGAGCTGACCACGACGAG-3'      | 5'-AAAGCCCATCTGGAGCCATC-3'       |
| <i>Xbp1</i>                                                                                                      | 5'-AAGCCCGGATGAGCGAGCTG-3'      | 5'-ACCCGGCCACCAGCCTTACT-3'       |
| <i>Sdc1</i>                                                                                                      | 5'-CAGGAAGGAAGTGCTGGGAG-3'      | 5'-GCTGCCTTCGTCTTCTTCT-3'        |
| <i>β-Actin</i>                                                                                                   | 5'-CTAAGGCCAACCGTCAAAG-3'       | 5'-ACCAGAGGCATACAGGGACA-3'       |
| <i>Gapdh</i>                                                                                                     | 5'-TTCACCACCATGGAGAAGGC-3'      | 5'-GGCATGGACTGTGGTCATGA-3'       |
| <i>Cd79b</i>                                                                                                     | 5'-CCACACTGGTGTCTTCC-3'         | 5'-GGGCTTCTTGGAAATTCAG-3'        |
| <u>Human genes</u>                                                                                               |                                 |                                  |
| <i>AICDA</i>                                                                                                     | 5'-GTCACCTGGTTCACCTCCTG-3'      | 5'-CTTGCGGTCCTCACAGAAAGT-3'      |
| <i>PRDM1</i>                                                                                                     | 5'-ATCTTGGGGTAAAAGCGGGT-3'      | 5'-TCCTGCACTACTGGACACAC-3'       |
| <i>β-ACTIN</i>                                                                                                   | 5'-AGAGCTACGAGCTGCCTGAC-3'      | 5'-AGCACTGTGTTGGCGTACAG-3'       |
| <u>Germline transcripts</u>                                                                                      |                                 |                                  |
| Mouse                                                                                                            |                                 |                                  |
| I $\mu$ -C $\mu$                                                                                                 | 5'-ACCTGGGAATGTATGGTTGTGGCTT-3' | 5'-GCAGGCAGGGCTAGATATGG-3'       |
| I $\gamma$ 1-C $\gamma$ 1                                                                                        | 5'-TCGAGAAGCCTGAGGAATGTG-3'     | 5'-ATGGAGTTAGTTTGGGCAGCA-3'      |
| I $\gamma$ 3-C $\gamma$ 3                                                                                        | 5'-AACTACTGCTACCACCACCACAG-3'   | 5'-AGCCAGGGACCAAGGGATAGAC-3'     |
| I $\gamma$ 2b-C $\gamma$ 2b                                                                                      | 5'-GATGGGGAGGAGTTGGCAGAT-3'     | 5'-CGGAGGAACCAGTTGTATC-3'        |
| I $\alpha$ -C $\alpha$                                                                                           | 5'-GCTTCCTGGAAAAGCAGCAAC-3'     | 5'-TAATCGTGAATCAGGCAG-3'         |
| I $\epsilon$ -C $\epsilon$                                                                                       | 5'-CCCCACTTTTAGCTGAGGGC-3'      | 5'-ACAGGGCTTCAAGGGGTAGA-3'       |
| Human                                                                                                            |                                 |                                  |
| I $\gamma$ 1-C $\gamma$ 1                                                                                        | 5'-CTTCCAAGCCAACAGGGCAG-3'      | 5'-ACCTGTGAGGTGGCTGCGTACTT-3'    |
| I $\alpha$ -C $\alpha$                                                                                           | 5'-GCCATCAAGGCAGGGCCTGGG-3'     | 5'-TGCGACGACCACGTTCCCATCTTGGG-3' |
| I $\epsilon$ -C $\epsilon$                                                                                       | 5'-GACGGGCCACACCATCC-3'         | 5'-CGGAGGTGGCATTGGAGG-3'         |
| <u>Mouse post-recombination transcripts</u>                                                                      |                                 |                                  |
| I $\mu$ -C $\gamma$ 1                                                                                            | 5'-ACCTGGGAATGTATGGTTGTGGCTT-3' | 5'-ATGGAGTTAGTTTGGGCAGCA-3'      |
| I $\mu$ -C $\gamma$ 2a                                                                                           | 5'-ACCTGGGAATGTATGGTTGTGGCTT-3' | 5'-GCTGGGCCAGGTGCTCGAGGTT-3'     |
| I $\mu$ -C $\gamma$ 2b                                                                                           | 5'-ACCTGGGAATGTATGGTTGTGGCTT-3' | 5'-CGGAGGAACCAGTTGTATC-3'        |
| I $\mu$ -C $\gamma$ 3                                                                                            | 5'-ACCTGGGAATGTATGGTTGTGGCTT-3' | 5'-AGCCAGGGACCAAGGGATAGAC-3'     |
| I $\mu$ -C $\alpha$                                                                                              | 5'-ACCTGGGAATGTATGGTTGTGGCTT-3' | 5'-TAATCGTGAATCAGGCAG-3'         |
| I $\mu$ -C $\epsilon$                                                                                            | 5'-ACCTGGGAATGTATGGTTGTGGCTT-3' | 5'-ACAGGGCTTCAAGGGGTAGA-3'       |
| <u>Human mature transcripts</u>                                                                                  |                                 |                                  |
| V <sub>H</sub> DJ <sub>H</sub> -C $\gamma$ 1                                                                     | 5'-CAGGTGCAGCTGGTGSARTCTGG-3'   | 5'-ACCTGTGAGGTGGCTGCGTACTT-3'    |
| V <sub>H</sub> DJ <sub>H</sub> -C $\alpha$                                                                       | 5'-CAGGTGCAGCTGGTGSARTCTGG-3'   | 5'-TGCGACGACCACGTTCCCATCTTGGG-3' |
| V <sub>H</sub> DJ <sub>H</sub> -C $\epsilon$                                                                     | 5'-CAGGTGCAGCTGGTGSARTCTGG-3'   | 5'-CGGAGGTGGCATTGGAGG-3'         |
| <u>Mature miRNA and sn/snoRNA forward primers (used with Qiagen miScript Universal Primer as reverse primer)</u> |                                 |                                  |
| miR-155-5p                                                                                                       | 5'-TTAATGCTAATTGTGATAGG-3'      |                                  |
| miR-181b-5p                                                                                                      | 5'-AACATTCATTGCTGTCCGGTG-3'     |                                  |
| miR-26a-5p                                                                                                       | 5'-TTCAAGTAATCCAGGATAGGCT-3'    |                                  |
| miR-125a-5p                                                                                                      | 5'-TCCCTGAGACCCCTTAACTGTGA-3'   |                                  |
| miR-30c-5p                                                                                                       | 5'-TGTAACATCCTACACTCTCAGC-3'    |                                  |
| miR-182-5p                                                                                                       | 5'-TTTGGCAATGGTAGAACTCACACCG-3' |                                  |
| miR-200c-5p                                                                                                      | 5'-TAATACTGCCGGTAATGATGGA-3'    |                                  |

Mir-let7a-5p 5'-TGAGGTAGTAGGTTGTATAGTT-3'  
 miR-19a/b-3p 5'-TGTGCAAATCTATGCAAAACTG-3'  
 miR-20a-5p 5'-AAAGTGCTTATAGTGCAGGTAG-3'  
 miR-25-3p 5'-CATTGCACTTGTCTCGGTCTG-3'  
 miR-24-3p 5'-TGGCTCAGTTCAGCAGGAACAG-3'  
 miR-106-5p 5'-CAAAGTGCTAACAGTGCAGGTAG-3'  
 miR-27b 5'-TTCACAGTGGCTAAGTTCTGC-3'  
 miR-186 5'-CAAAGAATTCTCCTTTTGGGCT-3'  
 miR-206-3p 5'-TGGAATGTAAGGAAGTGTGTGG-3'

miRNA host gene (HG) promoter ChIP

|             |                                |                                |
|-------------|--------------------------------|--------------------------------|
| mir-155-HG  | 5'-AAGGTCATGAGTTCAAGGCCAGC-3'  | 5'-TGTGCATGTGTGCATGAGTGCCT-3'  |
| mir-181b-HG | 5'-TGTGCATGTGTGCATGAGTGCCT-3'  | 5'-ACTGCAAGGACGCATGTAGGTCA-3'  |
| mir-26a-HG  | 5'-CGTCGGAAACACAAACACCC-3'     | 5'-GTGGCCCCCTCCTTACTATGC-3'    |
| mir-125a-HG | 5'-GGGCTCAGATTGCCAAGACA-3'     | 5'-GTTCTCCTCCACCCCATAGC-3'     |
| mir-30c-HG  | 5'-AACCTGACAGGGAAAGCTCTG -3'   | 5'-CTCATCCCGAGTGACCTGTG-3'     |
| mir-182-HG  | 5'-GGAAATGAGGTGGCCCTTGA-3'     | 5'-CCAGATGACCTCTGACCTGC-3'     |
| mir-200c-HG | 5'-AAGAAGGGGCTTCCAGGTTA-3'     | 5'-GGAAGTGTCCCAAATGACG-3'      |
| let-7a-HG   | 5'-GAAATGTTTGTGTGTGGTAGTCAG-3' | 5'-TCAGGGAATAAGGTTGCCTATCGC-3' |
| Mirc1       | 5'-TTGTTGCCCTCAGGACCTTG -3'    | 5'-CTTTCCGAGCCCCATTCCAA-3'     |
| Mirc3       | 5'-GCCAGGTCAATAAGCCCAGT-3'     | 5'-GCCAGGTCAATAAGCCCAGT-3'     |
| miR-106HG   | 5'-CTGAACGCCACCTTTACCCT-3'     | 5'-TCTTAGCTGTGGAAGGGGGA-3'     |
| Mirc22      | 5'-CTCCATGTCTCCACAGTCGC-3'     | 5'-GTTCTGCTGAACTGAGCCA-3'      |
| miR-186HG   | 5'-GGGCCACTGAACCGTGAG-3'       | 5'-CCCTGACAAGAAGTGAGCGT-3'     |
| miR-206HG   | 5'-AACAGCTGCCAGTGTCCATT-3'     | 5'-GCCCAGGCGCTATTGTACTT-3'     |

Aicda, Prdm1 and I<sub>H</sub> ChIP

|                           |                             |                              |
|---------------------------|-----------------------------|------------------------------|
| <i>Aicda</i> promoter     | 5'-GGAGGCAGATGTTGGATAACC-3' | 5'-ATATCGGTCTCCAGCGTGAC-3'   |
| <i>Aicda</i> region 4     | 5'-AAATCGGGGAATGCAGAAGT-3'  | 5'-TCCTCGGGTCACTATTTTTGG-3'  |
| <i>Prdm1</i> promoter     | 5'-ACTCCAGGACTACACAGCGA-3'  | 5'-GGATCGCTAGCTTCCCTGTGCG-3' |
| I <sub>μ</sub> promoter   | 5'-TGAAACACTCTGTCCAGCCC-3'  | 5'-GAGGACCTCTCCAGTTTCGG-3'   |
| I <sub>γ</sub> 1 promoter | 5'-CCCCAGAATGAAGGGGAACC-3'  | 5'-CAGCCTTTGTCCCAGAGAGG-3'   |
| I <sub>γ</sub> 3 promoter | 5'-ATCCACGTGATGCAGCTTGA-3'  | 5'-AATGCTACCCACACCCATC-3'    |
| I <sub>α</sub> promoter   | 5'-CGCATCTCTGTCTCAGGGTC-3'  | 5'-CTTGCCTCCAGTCATGTCT-3'    |

Somatic mutations

|                                                       |                                |                                |
|-------------------------------------------------------|--------------------------------|--------------------------------|
| V <sub>186.2</sub> DJ <sub>H</sub> -C <sub>γ</sub> 1  | 5'-CATGCTCTTCTTGGCAGCAACAGC-3' | 5'-GTGCACACCGCTGGACAGGGATCC-3' |
| V <sub>186.2</sub> DJ <sub>H</sub> -C <sub>γ</sub> 2b | 5'-CATGCTCTTCTTGGCAGCAACAGC-3' | 5'-CGGAGGAACCAAGTTGTATC-3'     |
| V <sub>186.2</sub> DJ <sub>H</sub> -C <sub>γ</sub> 3  | 5'-CATGCTCTTCTTGGCAGCAACAGC-3' | 5'-ACCAAGGGATAGACAGATGGGG-3'   |

---
